# Supplementary material
Source: publisher site journal article supplement (https://www.dovepress.com/article/299569)

**Supplementary material**

**Figure S1: Original acquisitions for Western blot experiments to study tyrosinase and GAPDH expression.**

Some of the unprocessed original acquisitions of blots by ChemiDoc Imaging System used to set up Fig. 3 for tyrosinase and GAPDH protein analysis, performed by Western blotting on cell extracts obtained from HEMa cultures and HEMa/HHFK co-cultures.


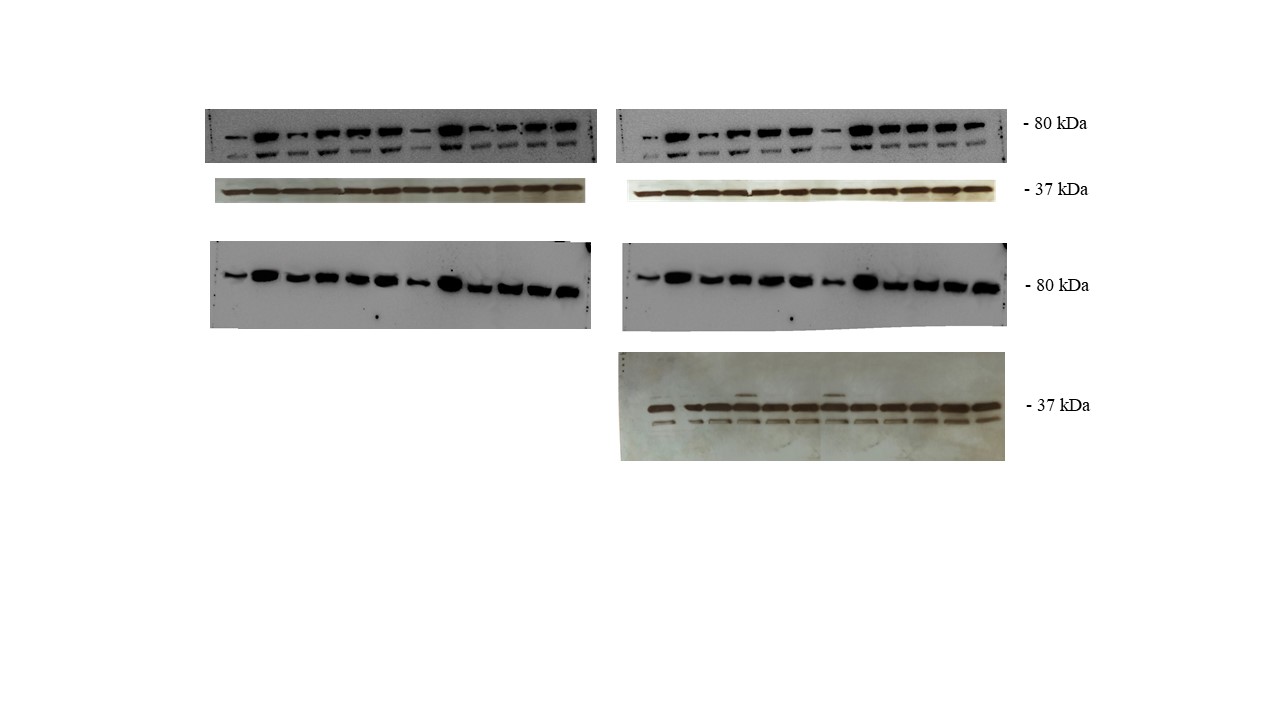


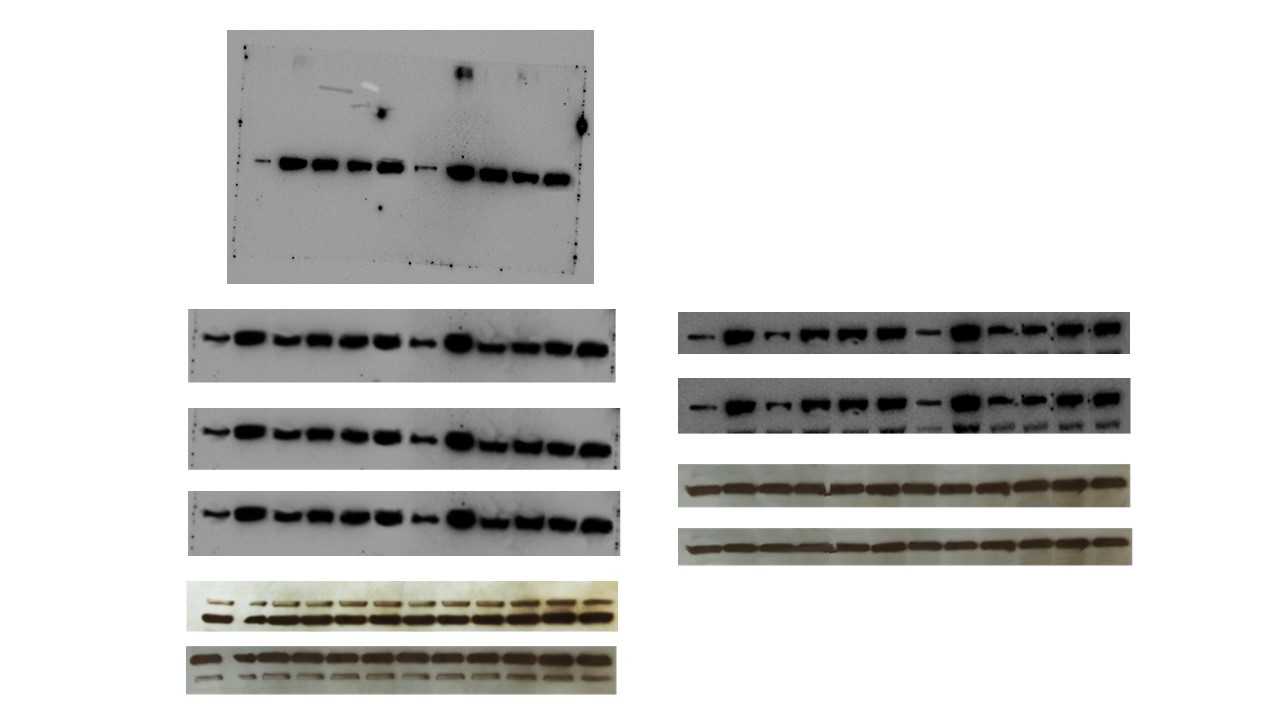


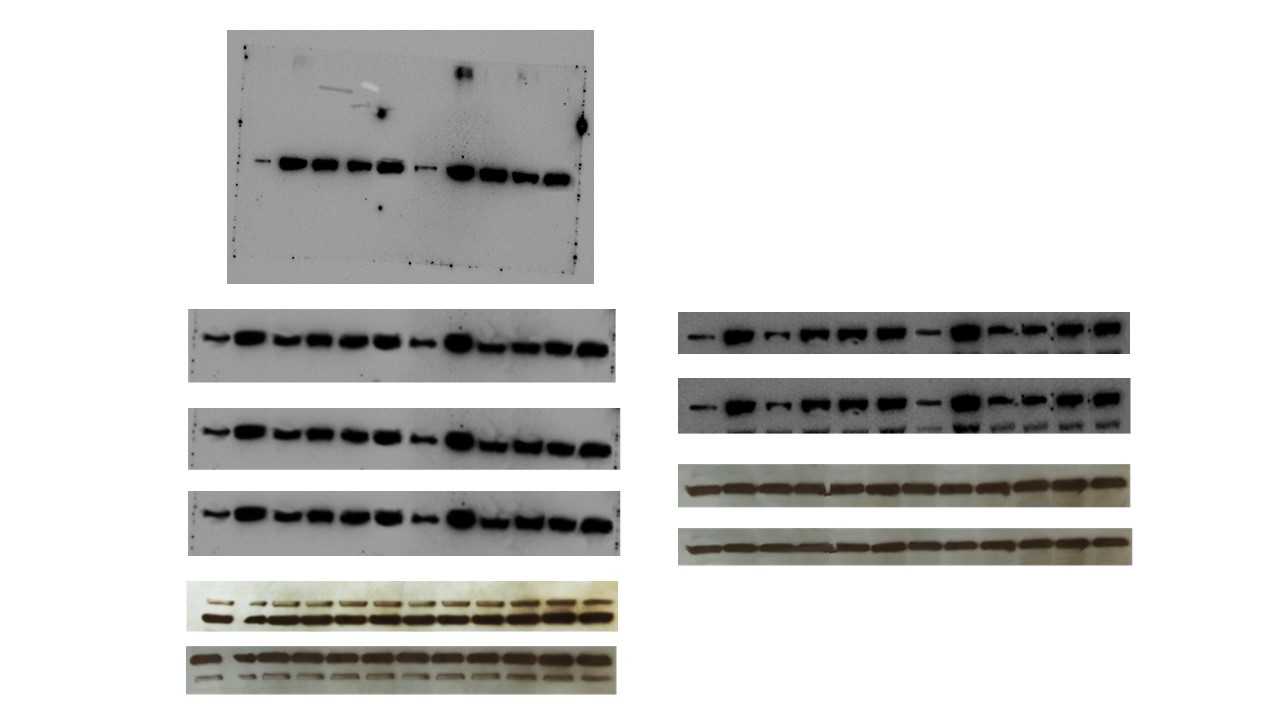

Supplement: Supplementary file 1 [file get_supplementary_file.php]
